# Supplementary material
Source: MDPI journal article supplement (https://www.mdpi.com/2077-0472/13/2/315)
Supplement: s1 [file s1]

**Supplementary Table S1. List of 204 germplasms used in the experiment.** A total of 204 *Vigna radiata* accessions including 127 Indian varieties, 58 Odisha landraces, 15 recombinant Inbred lines (RIL) along with 4 high yielding released varieties (OBGG-52, KAMDEV, IPM-02-3, IPM-02-14) with their codes are listed

| SI NO | <i>Vigna radiata</i><br>Germplasm<br>Name | SI<br>NO | <i>Vigna radiata</i> Germplasm Name |
|-------|-------------------------------------------|----------|-------------------------------------|
| G1    | ADT3                                      | G103     | SML1901                             |
| G2    | AKM12-24                                  | G104     | SML668                              |
| G3    | AKM8802                                   | G105     | SVM6133                             |
| G4    | ANGUL MUNG                                | G106     | TARM1                               |
| G5    | ASHAMUNG                                  | G107     | TM96-2                              |
| G6    | AVMU16100                                 | G108     | TMB134                              |
| G7    | AVMU1678                                  | G109     | TRCM351-2-1                         |
| G8    | AVMU1680                                  | G110     | USAM1771                            |
| G9    | AVMU1682                                  | G111     | V1000-318-AG                        |
| G10   | AVMU1683                                  | G112     | V1000-319-AG                        |
| G11   | AVMU1684                                  | G113     | V1001400-AG                         |
| G12   | AVMU1688                                  | G114     | VC3960-88                           |
| G13   | AVMU1691                                  | G115     | VC6153-13-20P                       |
| G14   | AVMU1695                                  | G116     | VC6368-46-40-1                      |
| G15   | AVMU1698                                  | G117     | VC6372(45-8-1)                      |
| G16   | AVMU1699                                  | G118     | VG15-29                             |
| G17   | BANSAPAL                                  | G119     | VG16-064                            |
| G18   | BC693367                                  | G120     | VGG14-1                             |
| G19   | BGS9                                      | G121     | VGG15-30                            |
| G20   | BM-2012-9                                 | G122     | VGG16-029                           |
| G21   | C693367                                   | G123     | VGG16-036                           |
| G22   | C693369                                   | G124     | VGG16-055                           |
| G23   | COGG13-39                                 | G125     | VGG16-058                           |
| G24   | COGG912                                   | G126     | CPR BAM GP 258                      |
| G25   | DGG8                                      | G127     | CPR BAM GP 262                      |
| G26   | DGVV18                                    | G128     | CPR BAM GP 267                      |
| G27   | EC693356                                  | G129     | CPR BAM GP 268                      |
| G28   | GANAGA1                                   | G130     | CPR BAM GP 273                      |
| G29   | GGG-1                                     | G131     | CPR BAM GP 280                      |
| G30   | GKM2016-1                                 | G132     | CPR BAM GP 283                      |
| G31   | HUM0936                                   | G133     | CPR BAM GP 287                      |
| G32   | HUM12                                     | G134     | CPR BAM GP 289                      |
| G33   | HUM2                                      | G135     | CPR BAM GP 290                      |
| G34   | HUM6                                      | G136     | CPR BAM GP 294                      |
| G35   | IGKM6-26-5                                | G137     | CPR BAM GP 295                      |
| G36   | IPM 205-7                                 | G138     | CPR BAM GP 297                      |
| G37   | IPM02-17                                  | G139     | CPR BAM GP 299                      |
| G38   | IPM312-20                                 | G140     | CPR BAM GP 301                      |
| G39   | IPM312-9                                  | G141     | CPR BAM GP 304                      |
| G40   | IPM409-4                                  | G142     | CPR BAM GP 305                      |
| G41   | IPM410-3                                  | G143     | CPR BAM GP 306                      |
| G42   | IPM410-9                                  | G144     | CPR BAM GP 312                      |
| G43   | IPM512-1                                  | G145     | CPR BAM GP 321                      |
| G44   | IPM-99-125                                | G146     | CPR BAM GP 324                      |

|     |                          |      |                       |
|-----|--------------------------|------|-----------------------|
| G45 | JAUM0936                 | G147 | CPR BAM GP 329        |
| G46 | JHAIN MUNG<br>GREEN      | G148 | CPR BAM GP 331        |
| G47 | KM2355                   | G149 | CPR BAM GP 333        |
| G48 | KM5-18-2                 | G150 | CPR BAM GP 334        |
| G49 | KPS1                     | G151 | CPR BAM GP 335        |
| G50 | KPS2                     | G152 | CPR BAM GP 337        |
| G51 | LGG450                   | G153 | CPR BAM GP 339        |
| G52 | LGG595                   | G154 | CPR BAM GP 342        |
| G53 | LGG807                   | G155 | CPR BAM GP 344        |
| G54 | MDGVV16                  | G156 | CPR BAM GP 345        |
| G55 | MGG373                   | G157 | CPR BAM GP 347        |
| G56 | MGG385                   | G158 | CPR BAM GP 348        |
| G57 | MH1315                   | G159 | CPR BAM GP 349        |
| G58 | MH1323                   | G160 | CPR BAM GP 351        |
| G59 | MH318                    | G161 | CPR BAM GP 353        |
| G60 | MH421                    | G162 | CPR BAM GP 354        |
| G61 | MK15-513                 | G163 | CPR BAM GP 359        |
| G62 | ML1115                   | G164 | KVK BANJANGAR-1       |
| G63 | ML1907                   | G165 | KVK BARAGARH-3-       |
| G64 | ML2056                   | G166 | KVK BOLANGIRI-1       |
| G65 | ML2479                   | G167 | KVK BOUDH-2           |
| G66 | ML818                    | G168 | KVK DHENKANAL-1       |
| G67 | NARENDRA<br>MUNG1        | G169 | KVK JAGATHSIGHPUR-1   |
| G68 | NAYAGARAH<br>LOCAL GREEN | G170 | KVK JAIPUR-1          |
| G69 | NBPGR150                 | G171 | KVK KENDRAPADA-1      |
| G70 | NDMK-16-324              | G172 | KVK NAYAGARH-1        |
| G71 | NM94                     | G173 | KVK NAYAGARH-6        |
| G72 | NVL855                   | G174 | KVK PURI -4           |
| G73 | OBGG102                  | G175 | KVK PURI-2            |
| G74 | OBGG56                   | G176 | KVK PURI-P68          |
| G75 | PANT MUNG4               | G177 | KVK SAMBALPUR 2       |
| G76 | PANT MUNG8               | G178 | KVK SAMBALPUR 3       |
| G77 | PAU911                   | G179 | KVK SUNDERGARH-II-2   |
| G78 | PDM11                    | G180 | KVK-JHARSUGUDA-1      |
| G79 | PDM139                   | G181 | KVK-MAYURABHANJA-11-1 |
| G80 | PM11-25                  | G182 | SUNDERGARH-11-3       |
| G81 | PM14-11                  | G183 | VBNGG2                |
| G82 | PM14-3                   | G184 | COPER GOAN            |
| G83 | PUSA M1772               | G185 | CPR BAM GP 302        |
| G84 | PUSA RATNA               | G186 | RIL 6                 |
| G85 | PUSA VISHAL              | G187 | RIL 10                |
| G86 | PUSA105                  | G188 | RIL 19                |
| G87 | PUSA1641                 | G189 | RIL 25                |
| G88 | PUSA1672                 | G190 | RIL 26                |
| G89 | PUSA1841                 | G191 | RIL 27                |
| G90 | PUSA1841                 | G192 | RIL 28                |
| G91 | PUSA9072                 | G193 | RIL 33                |
| G92 | PUSA9531                 | G194 | RIL 34                |

|      |           |      |           |
|------|-----------|------|-----------|
| G93  | PUSA-BM-1 | G195 | RIL 37    |
| G94  | RMB12-07  | G196 | RIL 38    |
| G95  | RMG1087   | G197 | RIL 42    |
| G96  | RMG1092   | G198 | RIL 45    |
| G97  | RMG1097   | G199 | RIL 50    |
| G98  | RMG344    | G200 | RIL 56    |
| G99  | RMG62     | C1   | OBGG-52   |
| G100 | SKNM1502  | C2   | KAMDEV    |
| G101 | SKNM1504  | C3   | IPM-02-3  |
| G102 | SML1815   | C4   | IPM-02-14 |

**Supplementary Table S2.** The Formulas used for computing germination and stress parameters. NS: control condition, S: Cold condition, Y: yield, X:

| Parameter category     | Parameter Name                         | Calculation                                                                                                                                                                                 | Reference                 |
|------------------------|----------------------------------------|---------------------------------------------------------------------------------------------------------------------------------------------------------------------------------------------|---------------------------|
| Germination parameters | Germination rate index (GRI)           | $GRI = G_1/1 + G_2/2 + \dots + G_x/x$<br>G <sub>1</sub> , G <sub>2</sub> ... G <sub>x</sub> represents the percentage of germination in first, second and xth day after sowing respectively | Almudaris and Samuel[30]  |
|                        | Mean germination time (MGT)            | $MGT = \sum (n_i/d_i)$<br>n <sub>i</sub> : number of germinated seeds,<br>d <sub>i</sub> : day of counting                                                                                  | Ellis and Roberts [60]    |
|                        | Coefficient of velocity of germination | Coefficient of velocity (CV) = (number of germinated seeds per day)<br>$CV_g = \sum N_i / 100 \times \sum (T_i \times N_i)$                                                                 | Kader and Jutzi[61]       |
|                        | Mean germination rate (MGR)            | $1/(MGT)$                                                                                                                                                                                   | Ranalet <i>al.</i> [62]   |
|                        | Timson's germination index             | Timson germination index (TGI) = $\sum G/T$ , where G is the percentage of seed germinated per day, and T is the germination period                                                         | Ajmal Khan & Ungar [31]   |
| Stress indices         | Promptness Index (PI)                  | $nd_2 (1.00) + nd_4 (0.75) + nd_6 (0.50) + nd_8 (0.25)$                                                                                                                                     | Sammar Raza [32]          |
|                        | Stress susceptibility index (SSI)      | $\{1 - (Y_s/Y_{NS})\} / \{1 - (X_s/X_{NS})\}$                                                                                                                                               | Fisher and Maurer [34]    |
|                        | Tolerance index (TOL)                  | $Y_{NS} - Y_s$                                                                                                                                                                              | Rosielle and Hamblin [35] |
|                        | Mean productivity (MP)                 | $(Y_s + Y_{NS})/2$                                                                                                                                                                          | Rosielle and Hamblin [35] |
|                        | Geometric mean productivity (GMP)      | $\sqrt{(Y_{NS} \times Y_s)}$                                                                                                                                                                | Fernandez[36]             |
|                        | Stress Tolerance Index (STI)           | $(Y_s \times Y_{NS})/X^2_{NS}$                                                                                                                                                              | Fernandez [36]            |
|                        | Plant height stress index              | [plant height of stressed plant/plant height of control plant] × 100                                                                                                                        | Nawas et al. [33]         |

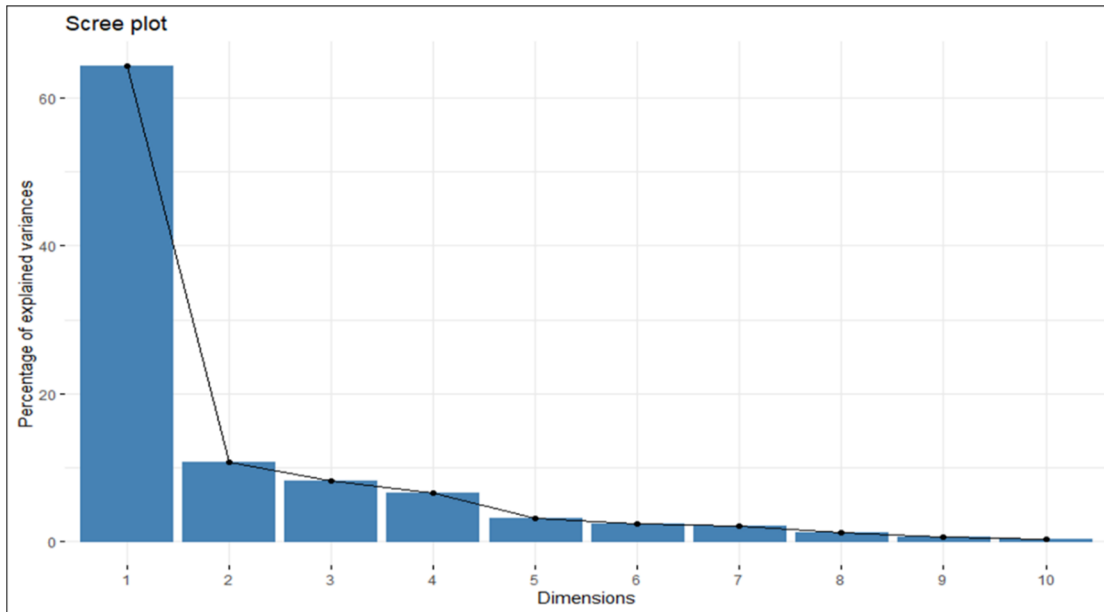

A.

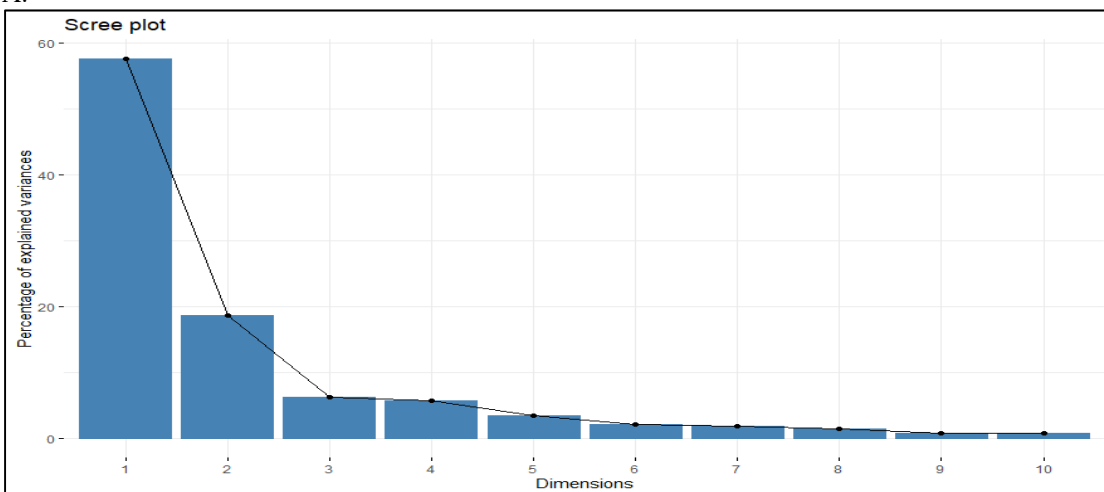

B.

**Supplementary Figure S1.** Scree plot displaying the variation of each principal component captured from the data taken at control conditions (A) and Cold stress (B). Dim indicates Dimensions/Principal components. PC1/Dim1 explains 64.4% and PC2/Dim2 explains 10.8% of the variance in data.

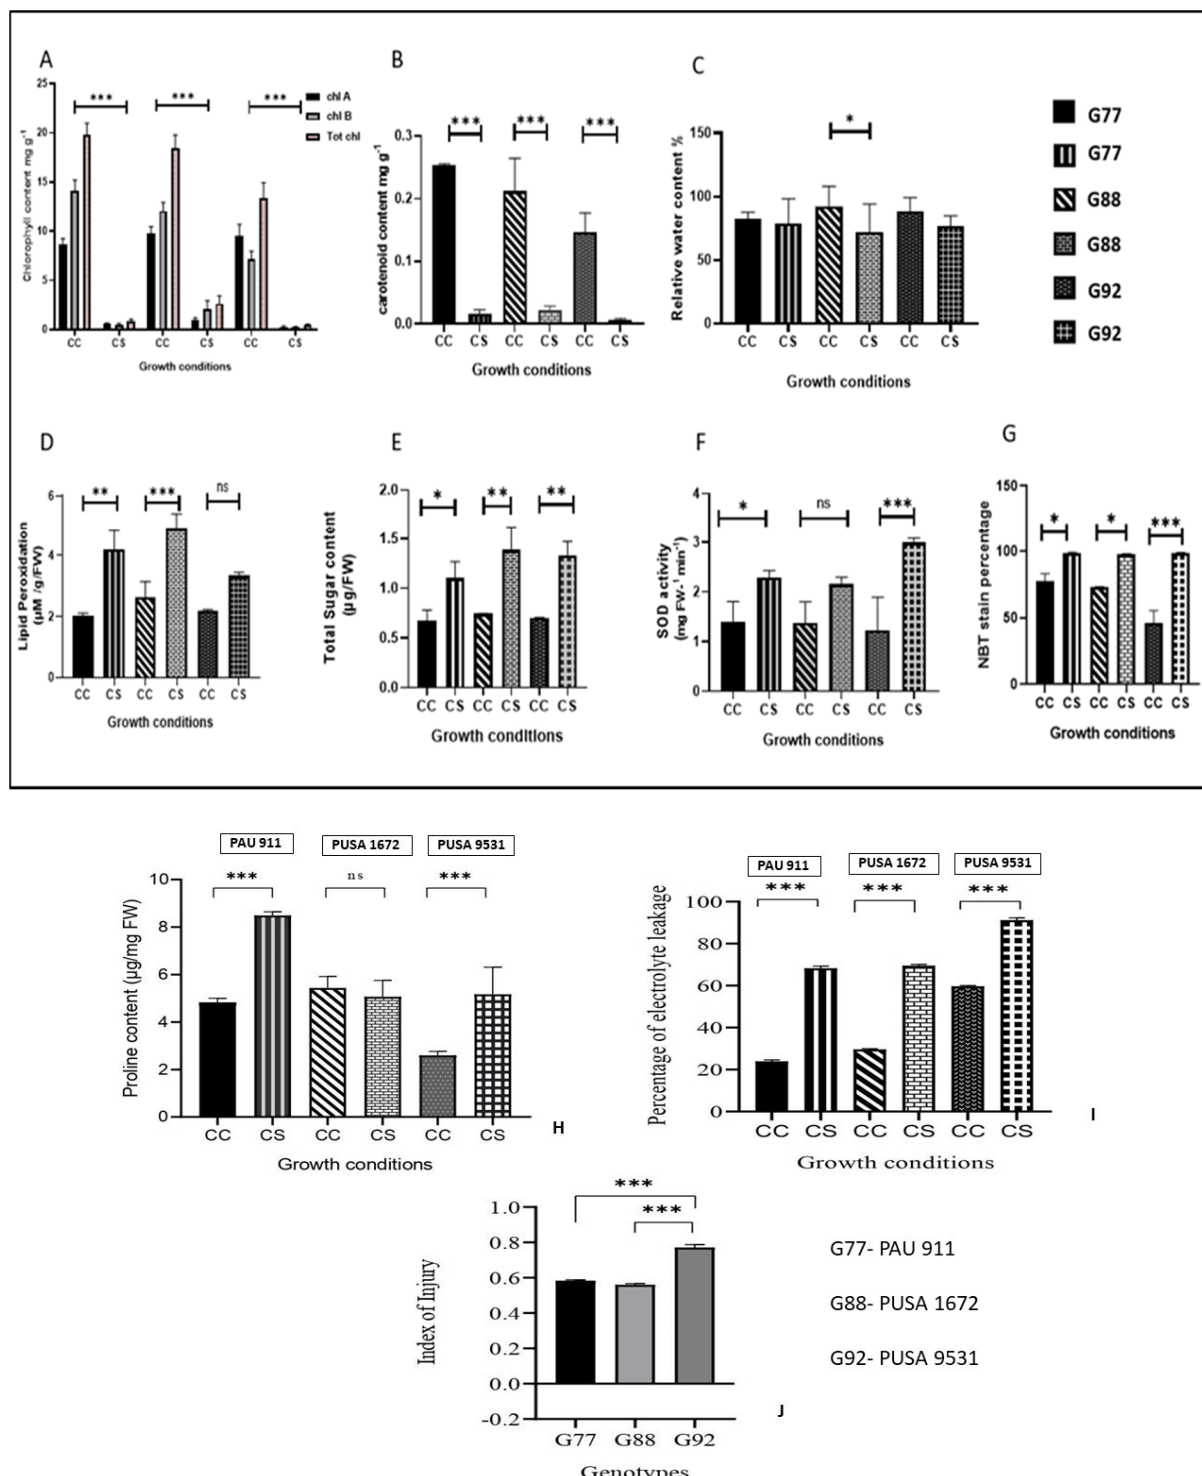

**Supplementary Figure S2. Biochemical analysis of cold stress response in selected *V. radiata* genotypes.** Biochemical parameters such as (A) Chlorophyll content, (B) Carotenoid content, (C) Relative water content, (D) Lipid peroxidation-Malondialdehyde (MDA), (E) Total sugar content, (F) SOD enzyme activity (G) O<sub>2</sub><sup>-</sup> Superoxide content, (H) Proline content, (I) Percentage of electrolyte leakage and (J) Index of injury were assayed in seedlings after germination and growth at 10°C for 8 days. Data represented were mean of 10 measurements for each with 3 biological replicates. Statistical significance using one-way ANOVA indicated as \*\*\* for p<0.0001, \*\* for p<0.001 and \* for p<0.01.
